# Supplementary material for: Evaluating carbon removal: Integrating technical potential with environmental, social, governance criteria, and sequestration permanence
Source: PubMed Central journal article supplement (PMC11664158; doi:10.1016/j.isci.2024.111418), 2024-11-19
Supplement: mmc1.pdf [file mmc1.pdf]

## **Supplemental information**

### **Evaluating carbon removal: Integrating technical potential with environmental, social, governance criteria, and sequestration permanence**

**Jan Mertens, Christian Breyer, Ronnie Belmans, Corinne Gendron, Patrice Geoffron, Carolyn Fischer, Elodie Du Fornel, Richard Lester, Kimberly A. Nicholas, Paulo Emilio V. de Miranda, Sarah Palhol, Peter Verwee, Olivier Sala, Michael Webber, and Koenraad Debackere**

# Fig S.1 Carbon Dioxide Removal (CDR) Technologies in this evaluation

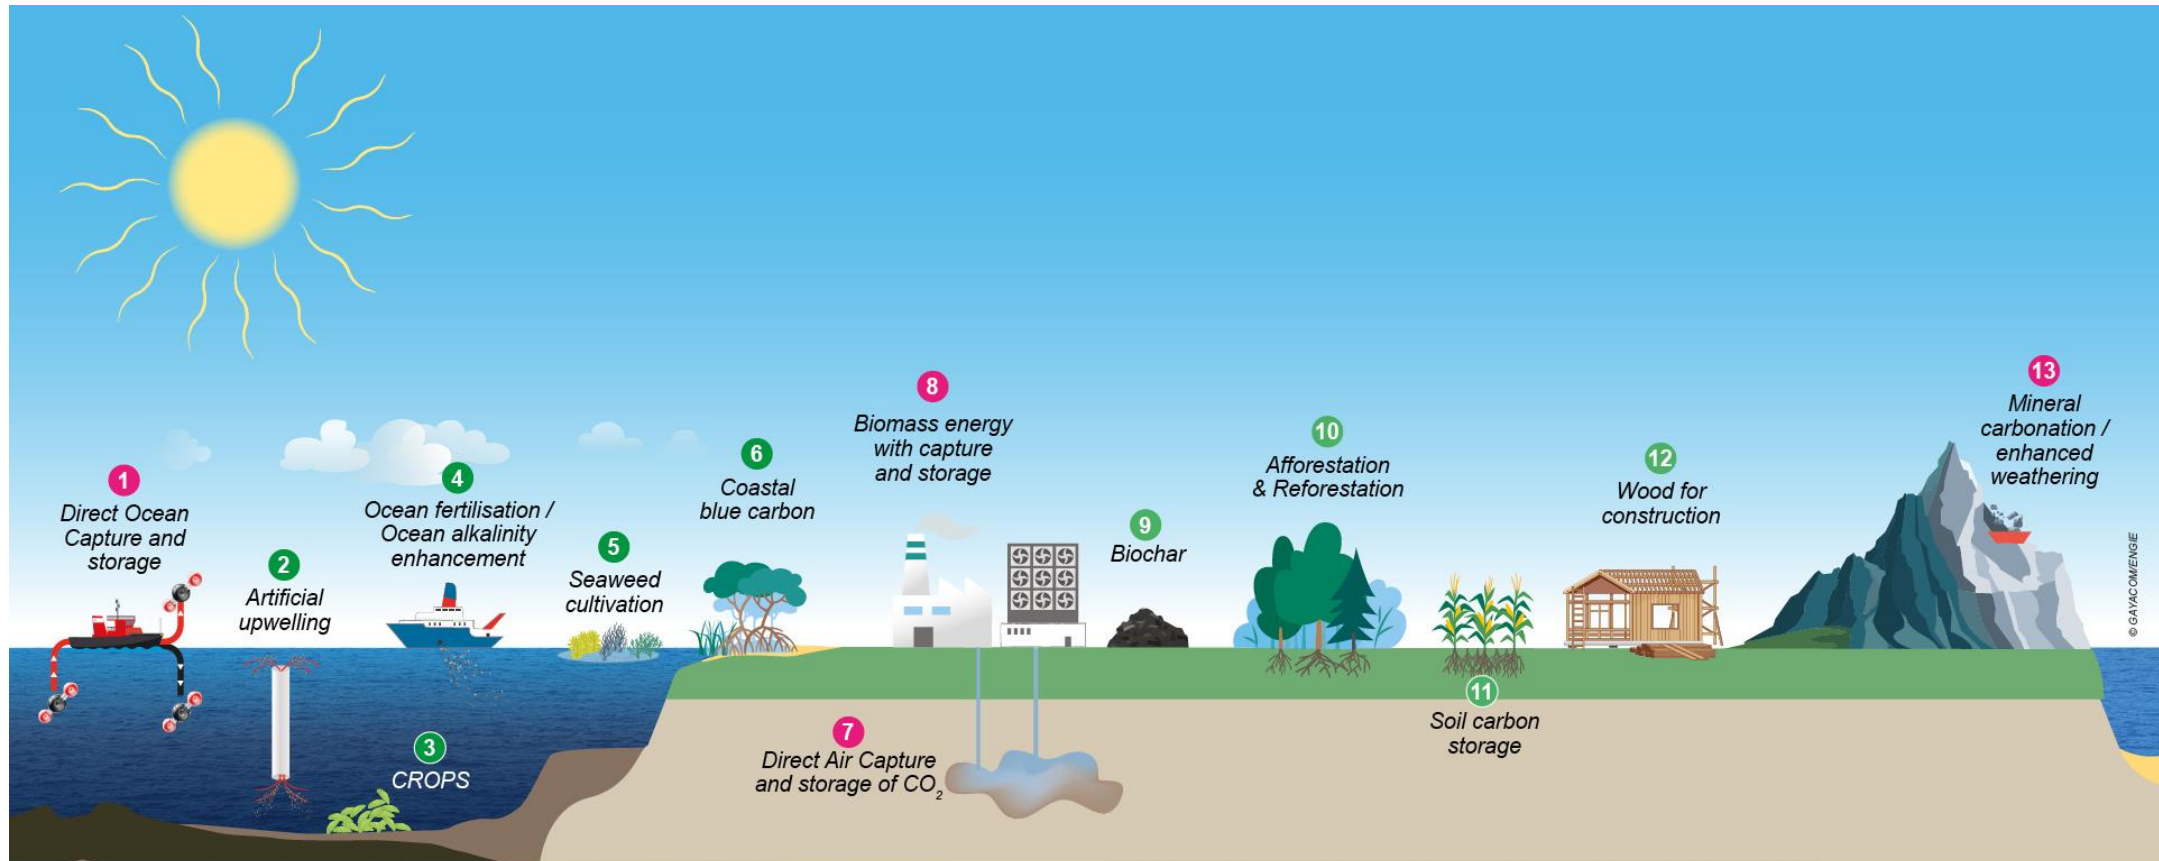

## Carbon Dioxide Removals (CDR technologies)

- 1 Direct Ocean Capture and storage
- 2 Artificial upwelling
- 3 CROPS
- 4 Ocean fertilisation / Ocean alkalinity enhancement (Increasing population of carbon-absorbing plankton)
- 5 Seaweed cultivation

- 6 Coastal blue carbon (Reforestation/ Mangrove restoration)
- 7 Direct Air Capture and storage of CO<sub>2</sub>
- 8 Biomass energy with capture and storage (Using biomass for energy and capturing the CO<sub>2</sub>)
- 9 Biochar (Carbon-rich charcoal from burnt crops added to soil)

- 10 Afforestation & Reforestation (Planting vast forests)
- 11 Soil carbon storage
- 12 Wood for construction
- 13 Mineral carbonation / enhanced weathering

**Legend:**  
● Nature based  
● Technology based

## Fig S.2 Technology-based Carbon Dioxide Removal technologies in this evaluation

|                                                  | Direct Air Carbon Capture and Sequestration (DACCS)                                | Bio Energy Carbon Capture and Sequestration (BECCS)                                                              | Mineral Carbonation                                                                                          | Enhanced Weathering                                                                                                  |
|--------------------------------------------------|------------------------------------------------------------------------------------|------------------------------------------------------------------------------------------------------------------|--------------------------------------------------------------------------------------------------------------|----------------------------------------------------------------------------------------------------------------------|
| <b>Definition</b>                                | CO <sub>2</sub> is captured from the atmosphere and then sequestered underground   | CO <sub>2</sub> , produced from biomass transformation into energy, is captured and then sequestered underground | conversion of alkaline minerals to solid carbonates, used as construction or filling materials               | alkaline minerals spread on the ground to increase the speed of naturally occurring weathering of silicates minerals |
| <b>Maturity (TRL)</b>                            | 7                                                                                  | 7-9                                                                                                              | 7-9                                                                                                          | 4                                                                                                                    |
| <b>Potential 2050 (GtCO<sub>2</sub>/y)</b>       | 10                                                                                 | 2.5                                                                                                              | 1                                                                                                            | 4                                                                                                                    |
| <b>Cost 2030 (€/tCO<sub>2</sub>)</b>             | 100-600                                                                            | 100-200                                                                                                          | 50-600                                                                                                       | 50-200                                                                                                               |
| <b>Cost trend 2050</b>                           |  |                              |                          |                                  |
| <b>Environmental, social, governance aspects</b> | Low biodiversity impact<br>Social acceptance risk<br>Lack of regulations           | Negative effect on biodiversity<br>Social acceptance risk                                                        | Mining needed (energy intensive)<br>Possible restrictions on uses,<br>Excluded from Emission Trading Systems | Increase soil quality, fight ocean acidification,<br>Mining needed (energy intensive)<br>No regulations              |

# Fig S.3 Onshore nature-based Carbon Dioxide Removal technologies in this evaluation

|                                                  | Reforestation                                                                     | Afforestation                                                                     | Soil Carbon Storage                                                                                                   | Biochar                                                                                  | Wood for construction                                                               |
|--------------------------------------------------|-----------------------------------------------------------------------------------|-----------------------------------------------------------------------------------|-----------------------------------------------------------------------------------------------------------------------|------------------------------------------------------------------------------------------|-------------------------------------------------------------------------------------|
| <b>Definition</b>                                | Planting forest on land that used to be forest (<50 years)                        | Planting forest on lands that used to be grasslands or shrublands                 | Increase of soil organic carbon content through agricultural management practices                                     | Stabilize biomass into a recalcitrant char than can be used as soil amendment            | Use wood for buildings                                                              |
| <b>Maturity (TRL)</b>                            | 9                                                                                 | 9                                                                                 | 7                                                                                                                     | 7                                                                                        | 9                                                                                   |
| <b>Potential 2050 (GtCO<sub>2</sub>/y)</b>       | 3.5*                                                                              | 3.5*                                                                              | 5                                                                                                                     | 2                                                                                        | 0.4                                                                                 |
| <b>Cost 2030 (€/tCO<sub>2</sub>)</b>             | 5-50                                                                              | 5-50                                                                              | 0-100                                                                                                                 | 30-120                                                                                   | Low                                                                                 |
| <b>Cost trend 2050</b>                           |  |  |                                    |       |  |
| <b>Environmental, social, governance aspects</b> | Conservation of biodiversity, Prevent deforestation                               | Fight desertification<br>Possible negative effect on biodiversity                 | Increase soil quality<br>Monitoring, Reporting, Verification (MRV) complex<br>Possible limitation on amount of offset | Increase soil quality<br>Risk for food security<br>Possible restrictions on applications | Avoid cement emissions<br>Europe favours usage of wood for construction             |

\*Total of 7GtCO<sub>2</sub> potential for afforestation & reforestation has been split equally between both solutions as no better info is available

## Fig S.4 Ocean-based Carbon Dioxide Removal technologies in this evaluation

|                                                  | Coastal Blue Carbon                                                                                                                                                | Direct Ocean Carbon Capture and Sequestration (DOCCS)                              | Ocean Fertilization                                                                      | Ocean artificial upwelling                                                                    | Ocean alkalinity enhancement                                                                                                                          | Seaweed cultivation                                                                                                                                                      | Crops                                                                                                                                                                   |
|--------------------------------------------------|--------------------------------------------------------------------------------------------------------------------------------------------------------------------|------------------------------------------------------------------------------------|------------------------------------------------------------------------------------------|-----------------------------------------------------------------------------------------------|-------------------------------------------------------------------------------------------------------------------------------------------------------|--------------------------------------------------------------------------------------------------------------------------------------------------------------------------|-------------------------------------------------------------------------------------------------------------------------------------------------------------------------|
| <b>Definition</b>                                | Carbon captured and stored by coastal ecosystems                                                                                                                   | Captures CO <sub>2</sub> directly from the seawater                                | Addition of micronutrients to increase CO <sub>2</sub> uptake                            | Bring nutrient-rich seawater from deep ocean to the surface                                   | Enhanced weathering applied to the ocean                                                                                                              | Large-scale seaweed cultivation and sequestration                                                                                                                        | burial of crop residues in the deep ocean                                                                                                                               |
| <b>Maturity (TRL)</b>                            | 6                                                                                                                                                                  | Low                                                                                | Low                                                                                      | Low                                                                                           | Low                                                                                                                                                   | Low                                                                                                                                                                      | Low                                                                                                                                                                     |
| <b>Potential 2050 (GtCO<sub>2</sub>/y)</b>       | 1                                                                                                                                                                  | 1                                                                                  | 6                                                                                        | 1                                                                                             | 20                                                                                                                                                    | 1                                                                                                                                                                        | 1                                                                                                                                                                       |
| <b>Cost 2030 (€/tCO<sub>2</sub>)</b>             | 170-220                                                                                                                                                            | 100-350                                                                            | 50-500                                                                                   | High                                                                                          | 40-260                                                                                                                                                | 25-125                                                                                                                                                                   | 50-100                                                                                                                                                                  |
| <b>Cost trend 2050</b>                           |                                                                                  |  |      |           |                                                                   |                                                                                      |                                                                                     |
| <b>Environmental, social, governance aspects</b> | <p>Conservation of biodiversity</p> <p>Monitoring, Reporting, Verification (MRV) risk</p> <p>Green washing complaints</p> <p>Dependency on national regulation</p> | <p>Fight ocean acidification</p> <p>Potential impact on marine ecosystem</p>       | <p>Change in natural cycles, MRV risks,</p> <p>May violate London Convention of Seas</p> | <p>Disturbance to regional balances, MRV risks</p> <p>Ocean's responsibility legal issues</p> | <p>Fight ocean acidification</p> <p>MRV risk,</p> <p>Disturbance of ocean biogeochemical functioning</p> <p>May violate London Convention of Seas</p> | <p>Unknown potential on marine ecosystem, MRV risk</p> <p>Disposable of valuable, nutritional and biomaterial resources</p> <p>May violate London Convention of Seas</p> | <p>Potential impact on marine ecosystem, MRV risk</p> <p>Disposable of valuable, nutritional and biomaterial resources</p> <p>May violate London Convention of Seas</p> |
